# Supplementary material for: Transformation of a layered perovskite to a defect perovskite via cooperative Li-insertion and O/N substitution
Source: Royal Society of Chemistry journal article supplement (doi:10.1039/c4dt02335h), 2014-09-15
Supplement: c4dt02335h5.pdf [file c4dt02335h5.pdf]

Electronic Supplementary Information

---

**Transformation of layered perovskite to defect perovskite *via* cooperative Li-insertion  
and O/N substitution**

Jung-Mi Kim, Young-Il Kim,\* Chee-Sung Park and Cheol-Hee Park

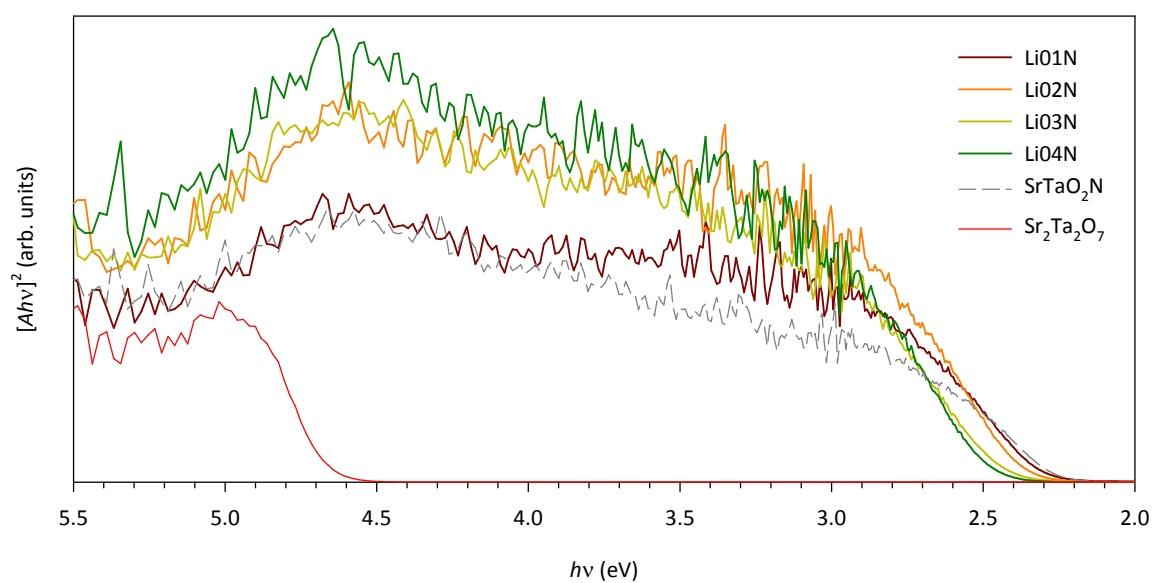

**Fig. S1.** Plot of  $(Ah\nu)^2$  vs.  $h\nu$ , from which the direct band gaps were estimated as follows: Li01N, 2.31 eV; Li02N, 2.37 eV; Li03N, 2.44 eV; Li04N, 2.49 eV; SrTaO<sub>2</sub>N, 2.26 eV; Sr<sub>2</sub>Ta<sub>2</sub>O<sub>7</sub>, 4.67 eV.

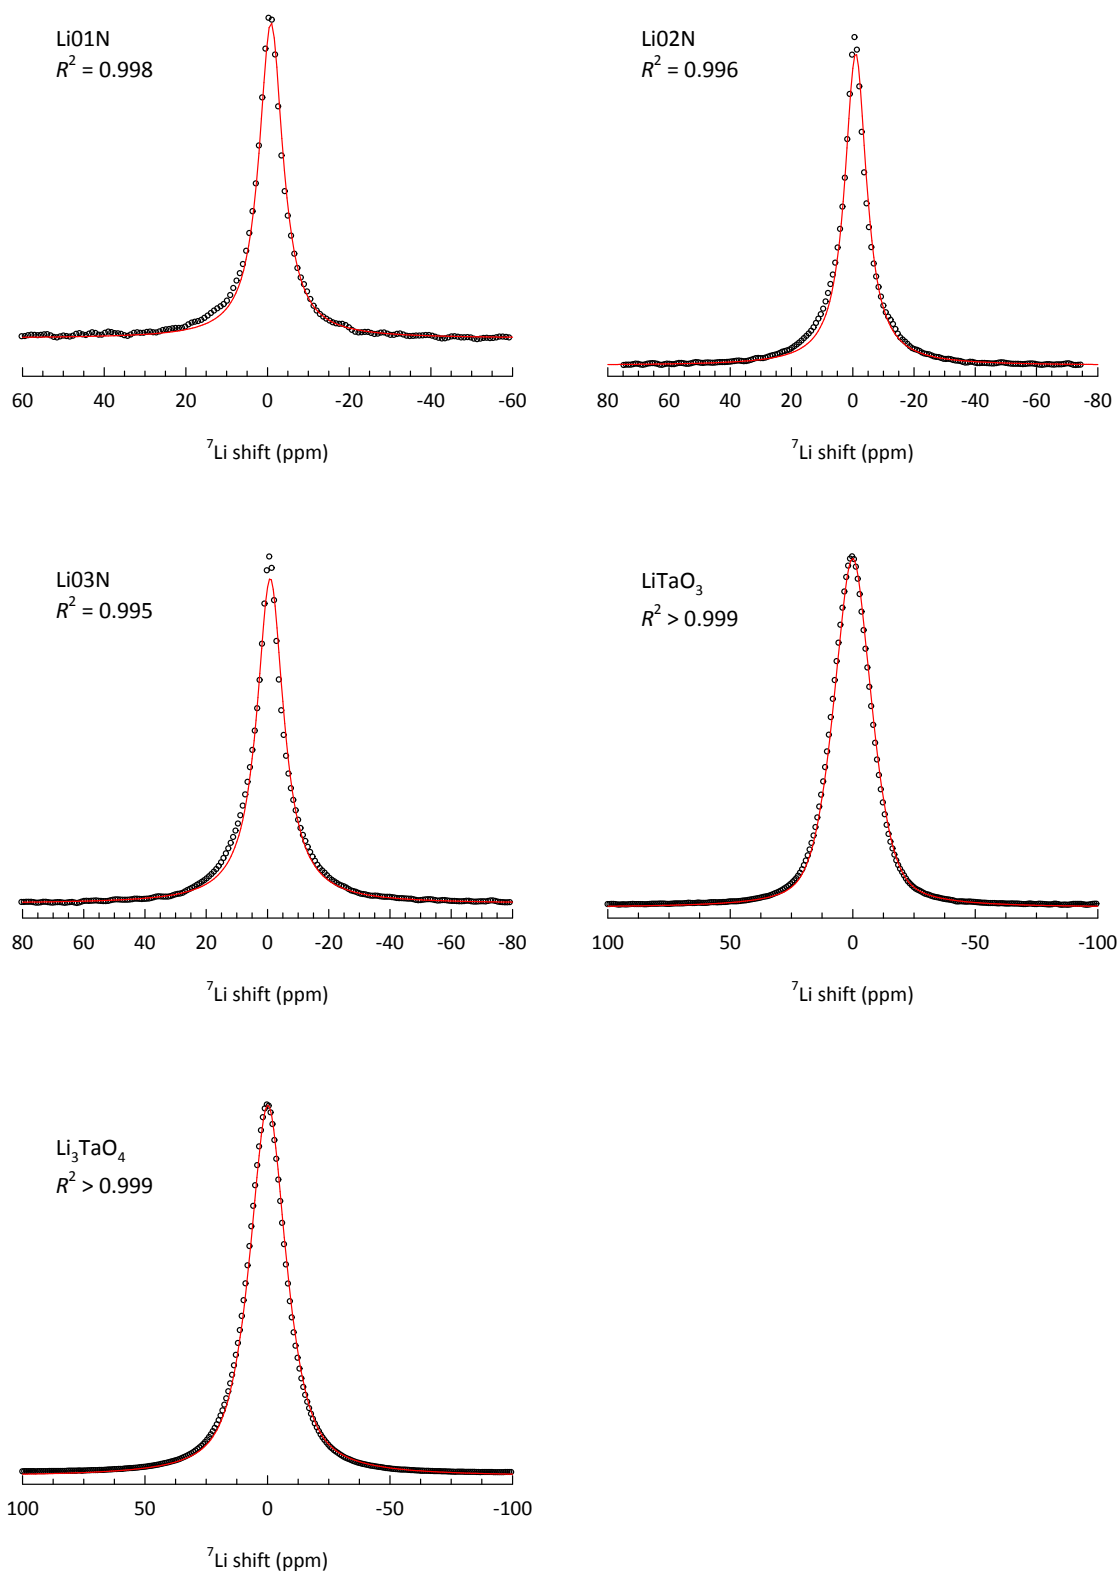

**Fig. S2.** Pseudo-Voigt peak fitting of  ${}^7\text{Li}$  MAS NMR spectra for Li01N, Li02N, Li03N, LiTaO<sub>3</sub>, and Li<sub>3</sub>TaO<sub>4</sub>. (circles: experimental, lines: fit)
